# Supplementary material for: Invertebrate extracellular phagocyte traps show that chromatin is an ancient defence weapon
Source: PubMed Central journal article supplement (PMC4143918; doi:10.1038/ncomms5627), 2014-08-13
Supplement: ncomms5627-s1.pdf [file ncomms5627-s1.pdf]

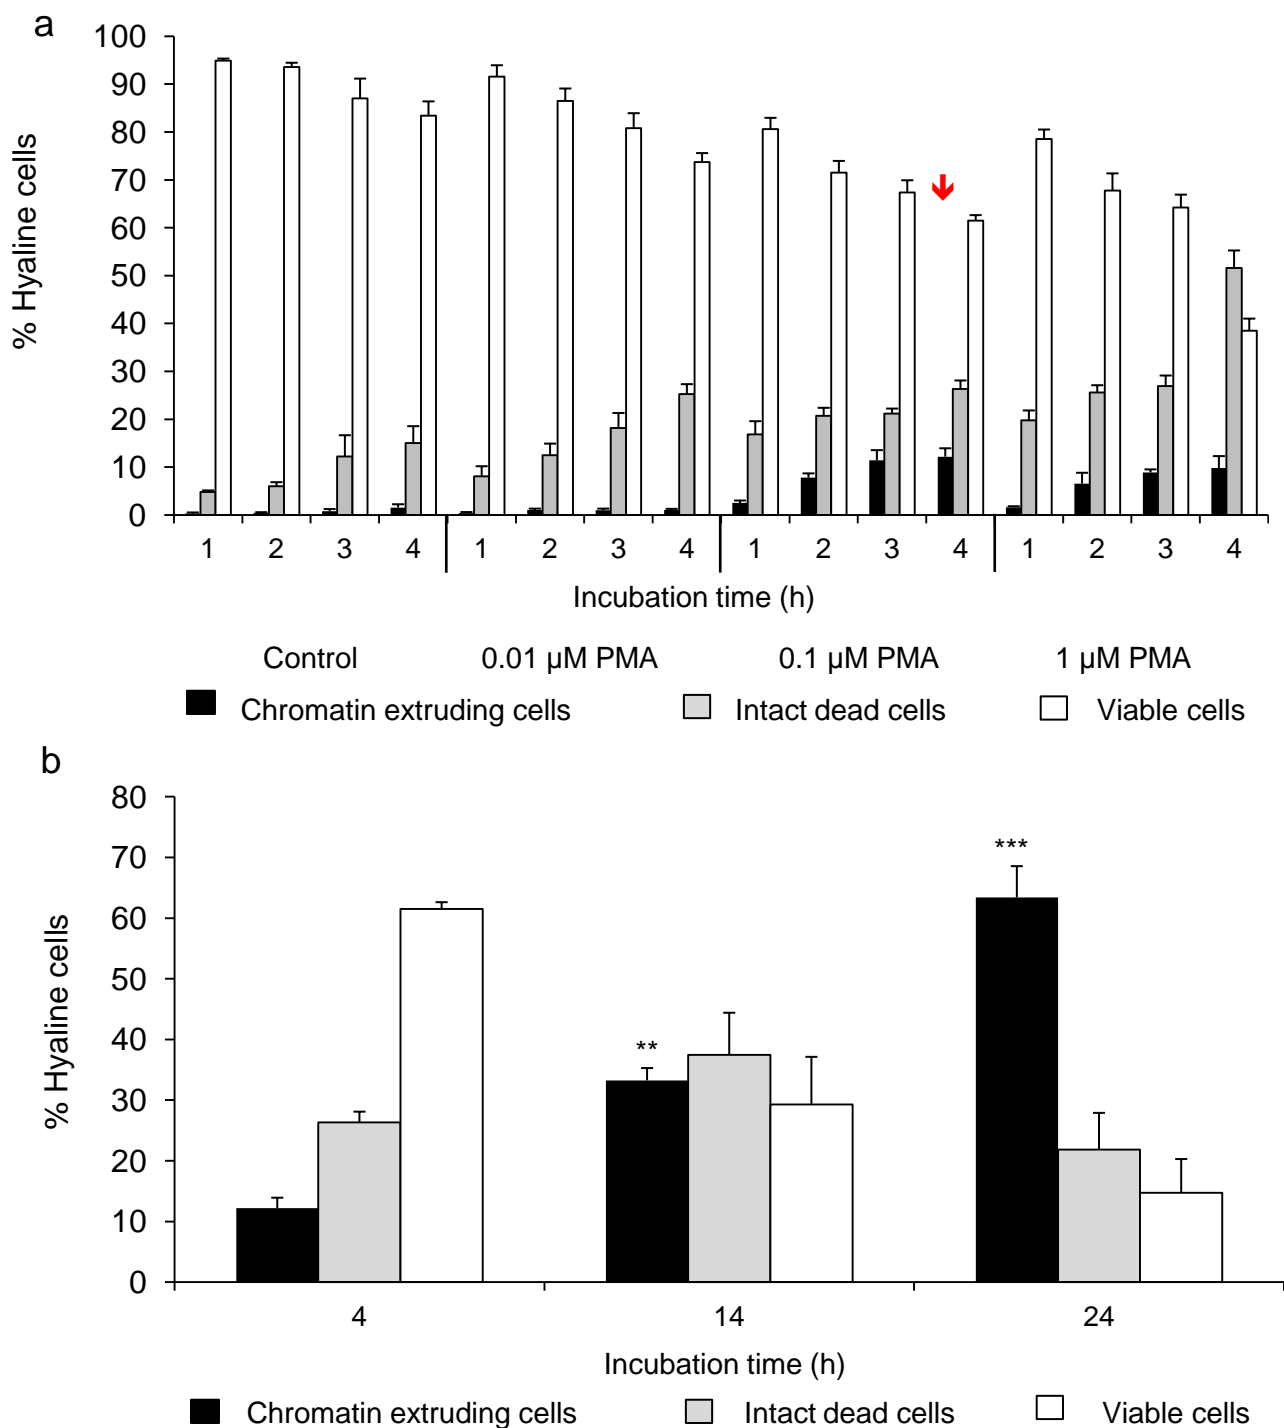

**Supplementary Figure 1. Effect of PMA on separated hyaline cells (HC) from crab *in vitro*.** Concentration-time analysis of the effect of PMA on separated HCs from *C. maenas* cultured in ML-15 medium. **(a)** Percentage of chromatin-extruding haemocytes with different concentrations of PMA over 4 h, as determined by confocal microscopy. Arrow indicates the optimal concentration (0.1  $\mu\text{M}$ ) of PMA for chromatin extrusion combined with overall lower value of non-ETotic cell death. **(b)** Percentage of chromatin-extruding cells over 24 h with 0.1  $\mu\text{M}$  PMA, showing significant differences (one-way ANOVA with Student-Newman-Keuls *post hoc* test) between chromatin-extruding haemocytes at 14 and 24 h compared to 4 h. \*\* represents  $P < 0.01$ ; \*\*\* represents  $P < 0.001$ . Values for (a) and (b) are means  $\pm$  s.e.m. ( $n = 3$ ).

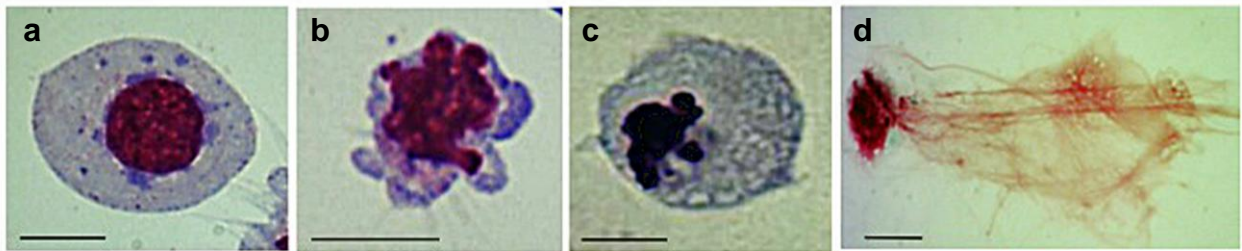

**Supplementary Figure 2. Morphological appearance of crab hyaline cells during apoptosis compared to ETosis as revealed by cytocentrifugation. (a)** Control, viable haemocyte with intact plasma and nuclear membranes. (b-c) Apoptotic HCs cultured for 24 h at 10 °C in ML-15 medium containing 10  $\mu$ M of the cyclin-dependent-kinase inhibitor, R-roscovitine (Calbiochem), an inducer of apoptosis<sup>1</sup> **(b)** Membrane blebbing **(c)** Condensed nucleus showing karyorrhexis. **(d)** ETotic cell with extruded chromatin after treatment with 0.1  $\mu$ M PMA (24 h). All cytocentrifuge preparations were stained with DiffQuik™. Scale bars (a-c) 10  $\mu$ m, (d) 20  $\mu$ m.

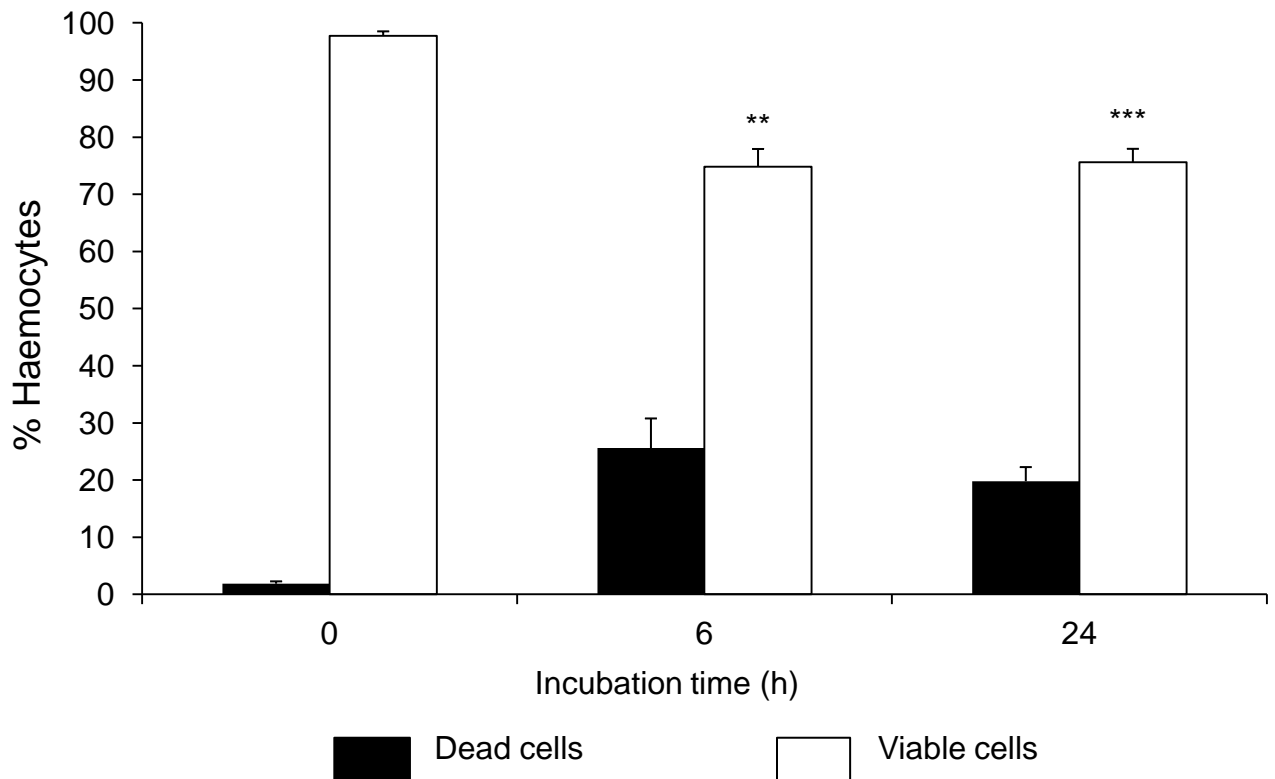

**Supplementary Figure 3. Viability of *C. maenas* haemocytes in suspension culture.** Washed unseparated *C. maenas* haemocytes cultured in suspension in ML-15 medium at 10 °C and analysed by flow cytometry at 0, 6 and 24 h. The haemocytes were stained with bovine lactadherin-FITC and propidium iodide. \*\*\*  $P < 0.001$  viable versus dead cells at 24 h, \*\*  $P < 0.01$  viable versus dead cells at 6 h. Significance calculated by one-way ANOVA with a Student-Neumann-Keuls *post-hoc* test. Values are means  $\pm$  s.e.m. ( $n = 3$ ).

### **Supplementary reference**

1. Rossi, A.G. *et al*, Cyclin-dependent kinase inhibitors enhance the resolution of inflammation by promoting inflammatory cell apoptosis. *Nat. Med.* **12**, 1056-1064 (2006).
